# Supplementary material
Source: PubMed Central journal article supplement (PMC6696928)
Supplement: NIHMS1526846-supplement-1.pdf [file NIHMS1526846-supplement-1.pdf]

# Supplemental Figures

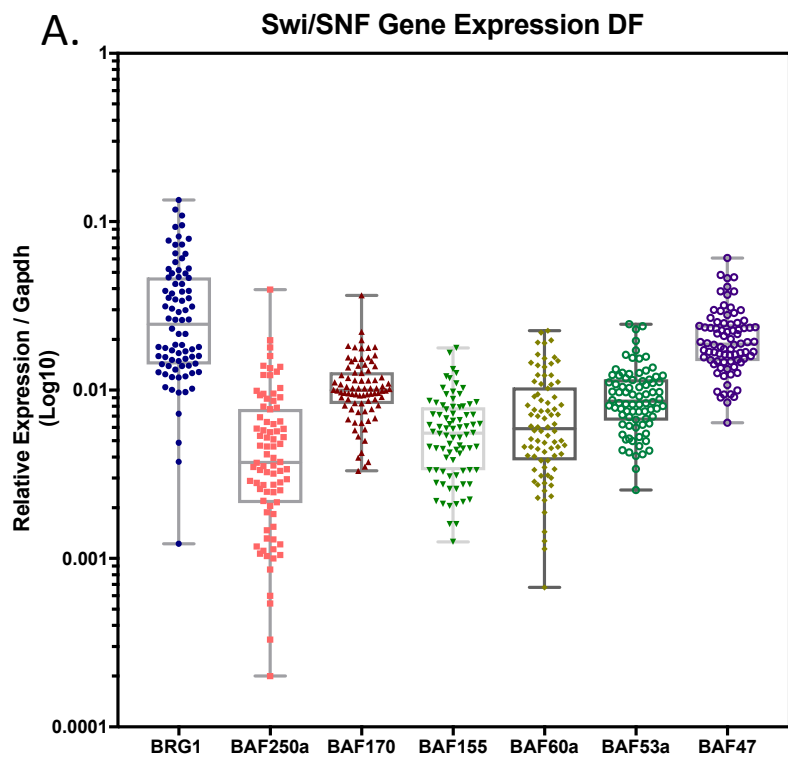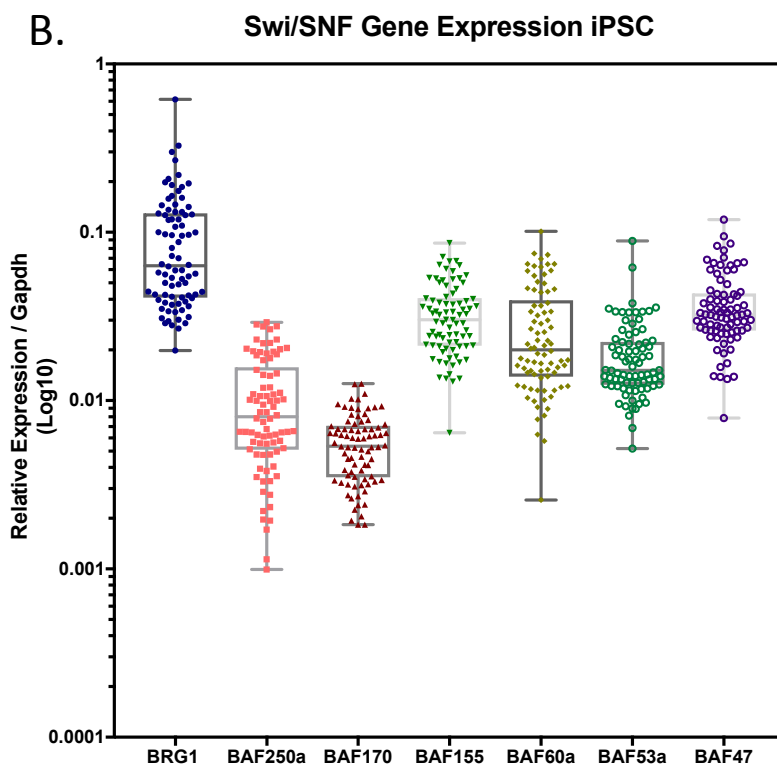

## Figure S1. Variability of SWI/SNF Expression in DF and iPSCs

Gene expression values for SWI/SNF subunits in DF (A) and iPSC (B) on a Log10 scale. Following iPSC Reprogramming the variability of expression is reduced for *BRG1*, *BAF250a*, *BAF170*, and *BAF155* compared to DF.

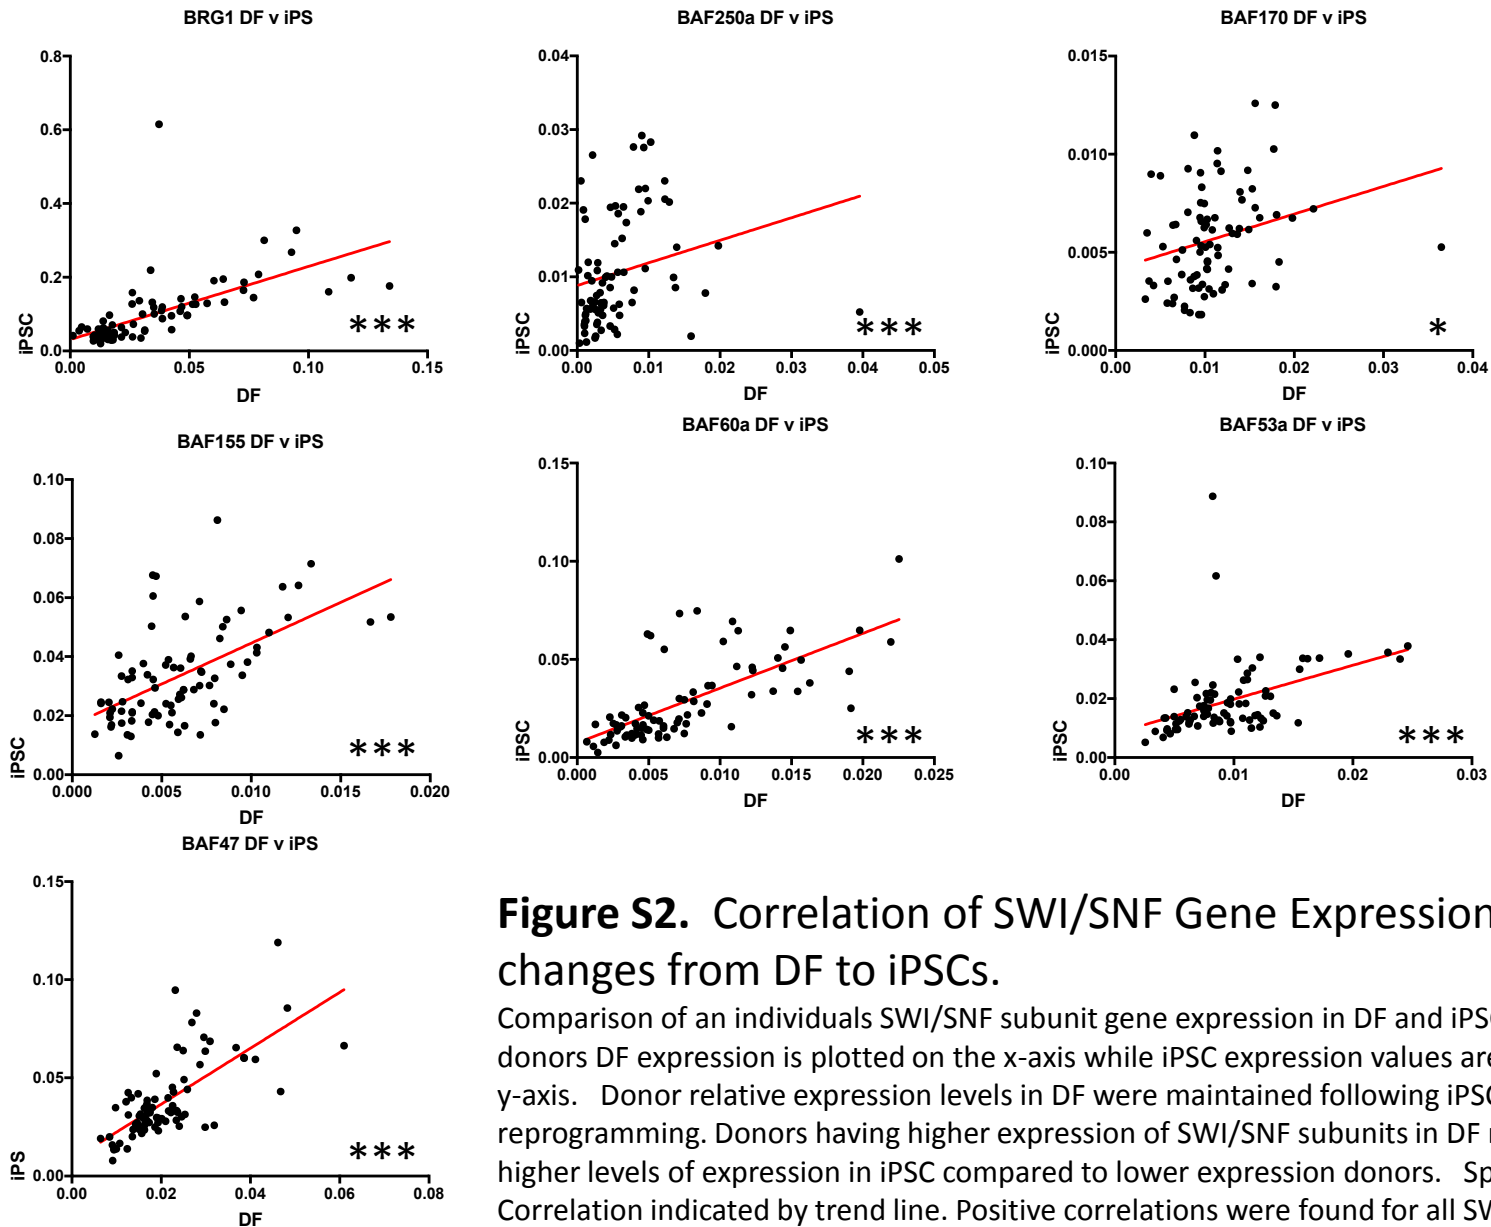

**Figure S2.** Correlation of SWI/SNF Gene Expression changes from DF to iPSCs.

Comparison of an individuals SWI/SNF subunit gene expression in DF and iPSCs. Each donors DF expression is plotted on the x-axis while iPSC expression values are plotted the y-axis. Donor relative expression levels in DF were maintained following iPSC reprogramming. Donors having higher expression of SWI/SNF subunits in DF maintained higher levels of expression in iPSC compared to lower expression donors. Spearman Correlation indicated by trend line. Positive correlations were found for all SWI/SNF subunits tested. \*= $p \leq 0.05$ , \*\*= $p \leq 0.01$ , \*\*\*= $p \leq 0.001$

### A. Pluripotency Gene Expression DF

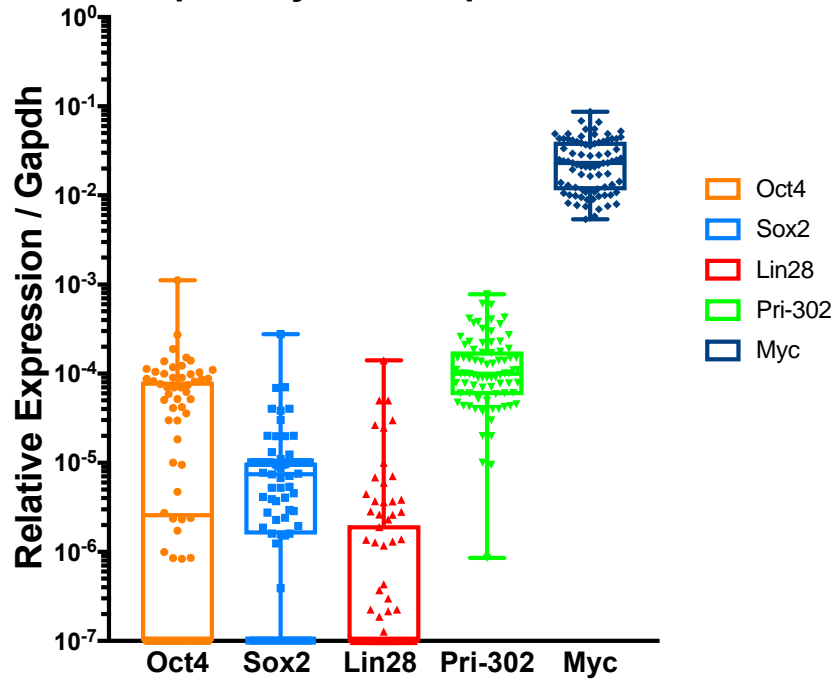

### B. Pluripotency Gene Expression iPSC

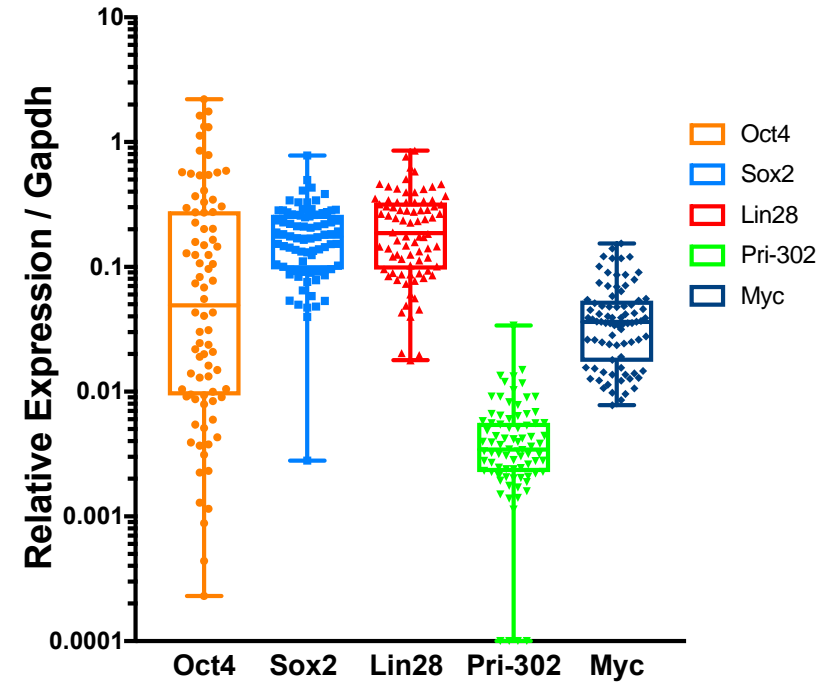

## Figure S3. Pluripotency-Associated Gene Expression in DF and iPSCs

GAPDH-normalized pluripotency-associated gene expression levels in DF (A) and iPSCs (B). Gene expression levels of *Oct4*, *Sox2*, *Lin28*, *Pri-miR-302*, and *Myc* were increased following iPSC reprogramming.

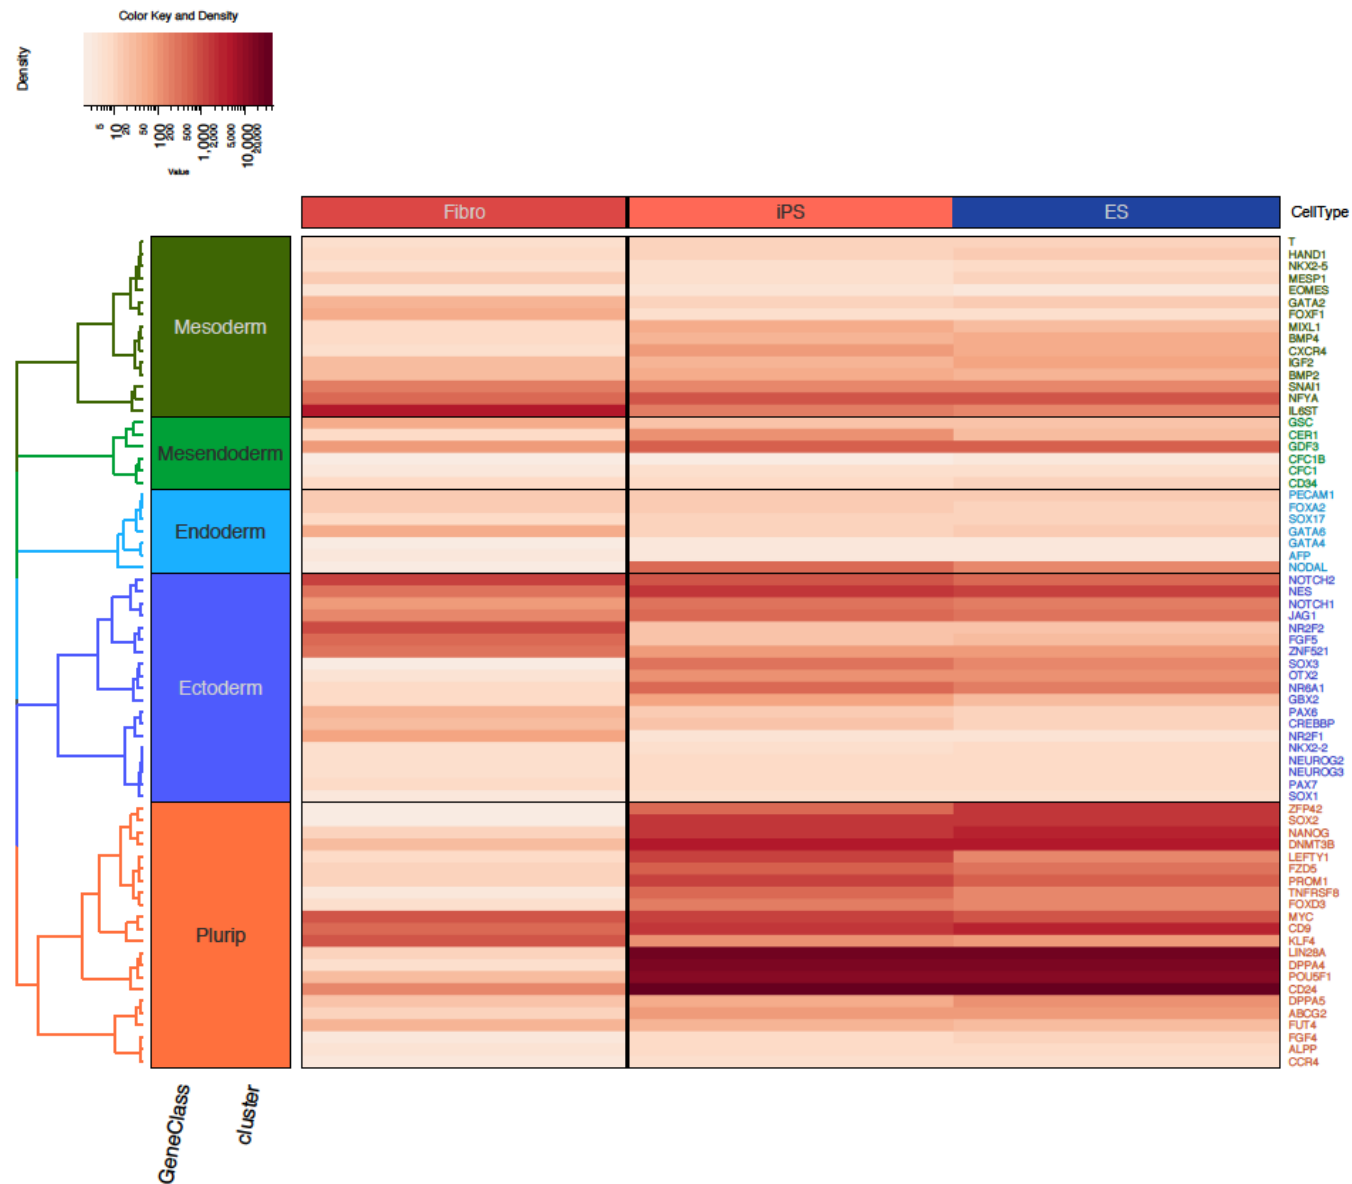

**Figure S4. Pluripotency-Associated Differentiation-Associated Gene Expression in DFs, iPSCs and ESCs.**

Nanostring analysis for the expression levels of 69 genes, comprising of markers of pluripotency and differentiation in cohort DFs, iPSCs and embryonic stem cell lines H1 and H9.



**Table S1. Cohort Demographics and Reprogramming Efficiencies**

| Sample ID | Sample Number | Sex    | Ancestry          | Age    | Number of IPS Colonies Generated | Percent Reprogramming Efficiency |
|-----------|---------------|--------|-------------------|--------|----------------------------------|----------------------------------|
| EF1       | 1             | Female | European American | 64 yrs | 72                               | 0.03                             |
| EF2       | 2             | Female | European American | 43 yrs | 833                              | 0.33                             |
| EM4       | 4             | Male   | European American | 22 yrs | 1655                             | 0.66                             |
| AM9       | 9             | Male   | African American  | 47 yrs | 626                              | 0.25                             |
| EF10      | 10            | Female | European American | 31 yrs | 421                              | 0.17                             |
| AF11      | 11            | Female | African American  | 42 yrs | 541                              | 0.22                             |
| EF12      | 12            | Female | European American | 23 yrs | 1139                             | 0.46                             |
| EM13      | 13            | Male   | European American | 49 yrs | 568                              | 0.23                             |
| EM14      | 14            | Male   | European American | 50 yrs | 156                              | 0.06                             |
| EM15      | 15            | Male   | European American | 49 yrs | 553                              | 0.22                             |
| AM16      | 16            | Male   | African American  | 37 yrs | 769                              | 0.31                             |
| EM17      | 17            | Male   | European American | 40 yrs | 572                              | 0.23                             |
| AF18      | 18            | Female | African American  | 36 yrs | 502                              | 0.20                             |
| AM19      | 19            | Male   | African American  | 23 yrs | 627                              | 0.25                             |
| AM20      | 20            | Male   | African American  | 38 yrs | 3105                             | 1.24                             |
| AM21      | 21            | Male   | African American  | 40 yrs | 1051                             | 0.42                             |
| AF22      | 22            | Female | African American  | 46 yrs | 1382                             | 0.55                             |
| AM23      | 23            | Male   | African American  | 28 yrs | 1842                             | 0.74                             |
| AF24      | 24            | Female | African American  | 25 yrs | 2349                             | 0.94                             |
| AF25      | 25            | Female | African American  | 25 yrs | 2146                             | 0.86                             |
| EF26      | 26            | Female | European American | 42 yrs | 2452                             | 0.98                             |
| EF27      | 27            | Female | European American | 48 yrs | 2185                             | 0.87                             |
| AM29      | 29            | Male   | African American  | 48 yrs | 2327                             | 0.93                             |
| AM30      | 30            | Male   | African American  | 43 yrs | 1951                             | 0.78                             |
| AF31      | 31            | Female | African American  | 28 yrs | 2226                             | 0.89                             |
| EF32      | 32            | Female | European American | 24 yrs | 600                              | 0.24                             |
| EF33      | 33            | Female | European American | 37 yrs | 315                              | 0.13                             |
| EF34      | 34            | Female | European American | 33 yrs | 2674                             | 1.07                             |
| EF35      | 35            | Female | European American | 20 yrs | 1954                             | 0.78                             |
| EF36      | 36            | Female | European American | 29 yrs | 1506                             | 0.60                             |
| EF37      | 37            | Female | European American | 21 yrs | 677                              | 0.27                             |
| EF38      | 38            | Female | European American | 20 yrs | 1981                             | 0.79                             |
| EF39      | 39            | Female | European American | 29 yrs | 47                               | 0.02                             |
| AF40      | 40            | Female | African American  | 23 yrs | 1866                             | 0.75                             |
| AF41      | 41            | Female | African American  | 23 yrs | 1701                             | 0.68                             |
| AF42      | 42            | Female | African American  | 31 yrs | 2174                             | 0.87                             |
| AF43      | 43            | Female | African American  | 31 yrs | 2624                             | 1.05                             |
| AF44      | 44            | Female | African American  | 30 yrs | 2068                             | 0.83                             |
| AM45      | 45            | Male   | African American  | 30 yrs | 2363                             | 0.95                             |
| AF46      | 46            | Female | African American  | 29 yrs | 944                              | 0.38                             |
| AF47      | 47            | Female | African American  | 38 yrs | 2390                             | 0.96                             |
| AF48      | 48            | Female | African American  | 30 yrs | 1500                             | 0.60                             |
| EF49      | 49            | Female | European American | 20 yrs | 728                              | 0.29                             |
| AM50      | 50            | Male   | African American  | 24 yrs | 3429                             | 1.37                             |
| AF51      | 51            | Female | African American  | 28 yrs | 443                              | 0.18                             |
| AM52      | 52            | Male   | African American  | 45 yrs | 1397                             | 0.56                             |
| AM53      | 53            | Male   | African American  | 35 yrs | 2537                             | 1.01                             |
| AM54      | 54            | Male   | African American  | 35 yrs | 2014                             | 0.81                             |
| AM55      | 55            | Male   | African American  | 33 yrs | 2234                             | 0.89                             |
| AF56      | 56            | Female | African American  | 40 yrs | 870                              | 0.35                             |
| EM57      | 57            | Male   | European American | 25 yrs | 1272                             | 0.51                             |
| AM58      | 58            | Male   | African American  | 27 yrs | 2664                             | 1.07                             |
| EM59      | 59            | Male   | European American | 31 yrs | 2829                             | 1.13                             |
| EF60      | 60            | Female | European American | 26 yrs | 2605                             | 1.04                             |
| AF61      | 61            | Female | African American  | 40 yrs | 1336                             | 0.53                             |
| AF62      | 62            | Female | African American  | 38 yrs | 1014                             | 0.41                             |
| AF63      | 63            | Female | African American  | 26 yrs | 2397                             | 0.96                             |
| EF64      | 64            | Female | European American | 40 yrs | 1682                             | 0.67                             |
| AM65      | 65            | Male   | African American  | 22 yrs | 1510                             | 0.60                             |
| AF66      | 66            | Female | African American  | 21 yrs | 586                              | 0.23                             |
| EM67      | 67            | Male   | European American | 26 yrs | 1584                             | 0.63                             |
| AM68      | 68            | Male   | African American  | 49 yrs | 1220                             | 0.49                             |
| EF74      | 74            | Female | European American | 28 yrs | 1446                             | 0.58                             |
| EF75      | 75            | Female | European American | 47 yrs | 1568                             | 0.63                             |
| EM76      | 76            | Male   | European American | 30 yrs | 1302                             | 0.52                             |
| EM77      | 77            | Male   | European American | 26 yrs | 580                              | 0.23                             |
| EM78      | 78            | Male   | European American | 53 yrs | 1075                             | 0.43                             |
| AM79      | 79            | Male   | African American  | 44 yrs | 538                              | 0.22                             |
| AM80      | 80            | Male   | African American  | 52 yrs | 1189                             | 0.48                             |
| AM81      | 81            | Male   | African American  | 46 yrs | 157                              | 0.06                             |
| AM82      | 82            | Male   | African American  | 51 yrs | 2455                             | 0.98                             |
| AM83      | 83            | Male   | African American  | 47 yrs | 1564                             | 0.63                             |
| EM85      | 85            | Male   | European American | 23 yrs | 385                              | 0.15                             |
| EM86      | 86            | Male   | European American | 50 yrs | 568                              | 0.23                             |
| EM87      | 87            | Male   | European American | 21 yrs | 625                              | 0.25                             |
| EM88      | 88            | Male   | European American | 38 yrs | 1211                             | 0.48                             |
| EM89      | 89            | Male   | European American | 45 yrs | 1085                             | 0.43                             |
| EM90      | 90            | Male   | European American | 49 yrs | 887                              | 0.35                             |
| EM91      | 91            | Male   | European American | 26 yrs | 1453                             | 0.58                             |
| EM92      | 92            | Male   | European American | 39 yrs | 935                              | 0.37                             |
